# Supplementary material
Source: Springer Nature journal article supplement (https://mijn.bsl.nl/resource/supplementary/13047_2013_566_MOESM2_ESM.pdf/7112404)

PC 2

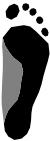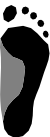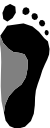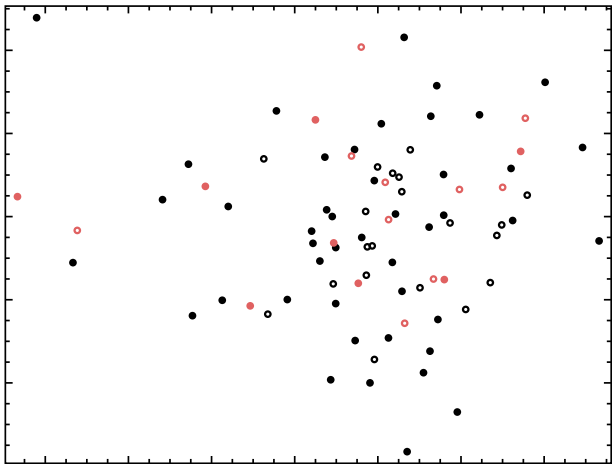

PC 1

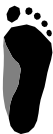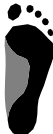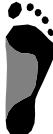

Supplement: MOESM2 [file 7112404]
